# Supplementary material
Source: PubMed Central journal article supplement (PMC3209535)
Supplement: NIHMS320425-supplement-3_si_003.pdf [file NIHMS320425-supplement-3_si_003.pdf]

**sTable 1.** Demographic characteristics of coke-oven workers.

| Parameters                   | Coke-oven workers (n=16)  | <i>p</i> -value <sup>c</sup> |
|------------------------------|---------------------------|------------------------------|
| Smoking N (%)                | 11 (68.8%)                |                              |
|                              | Median (IQR) <sup>a</sup> |                              |
| Age in yrs                   | 46 (35, 53)               |                              |
| 1-Hydroxypyrene <sup>b</sup> |                           |                              |
| Pre-shift                    | 0.29 (0.17, 0.40)         | 0.0002                       |
| End-of-shift                 | 2.58 (1.15, 4.26)         |                              |
| Across-the-shift             | 2.29 (0.98, 3.85)         |                              |
| 1-Naphthol <sup>b</sup>      |                           |                              |
| Pre-shift                    | 0.75 (0.16, 1.23)         | 0.0019                       |
| End-of-shift                 | 2.31 (0.76, 3.79)         |                              |
| Across-the-shift             | 1.03 (0.38, 2.39)         |                              |
| 2-Naphthol <sup>b</sup>      |                           |                              |
| Pre-shift                    | 0.42 (0.36, 1.50)         | 0.4437                       |
| End-of-shift                 | 2.07 (0.95, 4.05)         |                              |
| Across-the-shift             | 1.30 (-0.34, 3.16)        |                              |
| 9-Phenanthrol <sup>b</sup>   |                           |                              |
| Pre-shift                    | 0.13 (0.07, 0.24)         | 0.0039                       |
| End-of-shift                 | 1.00 (0.38, 1.21)         |                              |
| Across-the-shift             | 0.87 (0.22, 1.07)         |                              |

<sup>a</sup>IQR: Interquartile range.

<sup>b</sup>μmole/mole creatinine.

<sup>c</sup>Wilcoxon signed-rank test.
