# Supplementary material
Source: PubMed Central journal article supplement (PMC3209535)
Supplement: NIHMS320425-supplement-7_si_007.pdf [file NIHMS320425-supplement-7_si_007.pdf]

**sTable 1.** Demographic characteristics of coke-oven workers.

| <b>Parameters</b>            | <b>Coke-oven workers (n=16)</b> | <b><i>p</i>-value<sup>c</sup></b> |
|------------------------------|---------------------------------|-----------------------------------|
| Smoking N (%)                | 11 (68.8%)                      |                                   |
|                              | Median (IQR) <sup>a</sup>       |                                   |
| Age in yrs                   | 46 (35, 53)                     |                                   |
| 1-Hydroxypyrene <sup>b</sup> |                                 |                                   |
| Pre-shift                    | 0.29 (0.17, 0.40)               | 0.0002                            |
| End-of-shift                 | 2.58 (1.15, 4.26)               |                                   |
| Across-the-shift             | 2.29 (0.98, 3.85)               |                                   |
| 1-Naphthol <sup>b</sup>      |                                 |                                   |
| Pre-shift                    | 0.75 (0.16, 1.23)               | 0.0019                            |
| End-of-shift                 | 2.31 (0.76, 3.79)               |                                   |
| Across-the-shift             | 1.03 (0.38, 2.39)               |                                   |
| 2-Naphthol <sup>b</sup>      |                                 |                                   |
| Pre-shift                    | 0.42 (0.36, 1.50)               | 0.4437                            |
| End-of-shift                 | 2.07 (0.95, 4.05)               |                                   |
| Across-the-shift             | 1.30 (-0.34, 3.16)              |                                   |
| 9-Phenanthrol <sup>b</sup>   |                                 |                                   |

|                  |                   |        |
|------------------|-------------------|--------|
| Pre-shift        | 0.13 (0.07, 0.24) | 0.0039 |
| End-of-shift     | 1.00 (0.38, 1.21) |        |
| Across-the-shift | 0.87 (0.22, 1.07) |        |

<sup>a</sup>IQR: Interquartile range.

<sup>b</sup>μmole/mole creatinine.

**sTable 2.** Significance genes clustered based on biological process/molecular function

by DAVID Bioinformatics.

---

| <b>Biological process/molecular<br/>function</b>  | <b>No. genes</b> | <b>Gene symbols</b>                                                        |
|---------------------------------------------------|------------------|----------------------------------------------------------------------------|
| Metal ion binding/cation<br>binding               | 10               | ARFGAP2, E4F1, PHF2, ASXL2, AIFM3, HAGHL,<br>ITSN2, PTGR1, SLC12A7, ZNF335 |
| Transport (e.g., amino acid,<br>ion, or electron) | 6                | ARFGAP2, NIPAL4, AIFM3, SLC12A7, SLC25A34,<br>SPNS3                        |

---
