# Supplementary material
Source: PubMed Central journal article supplement (PMC3209535)

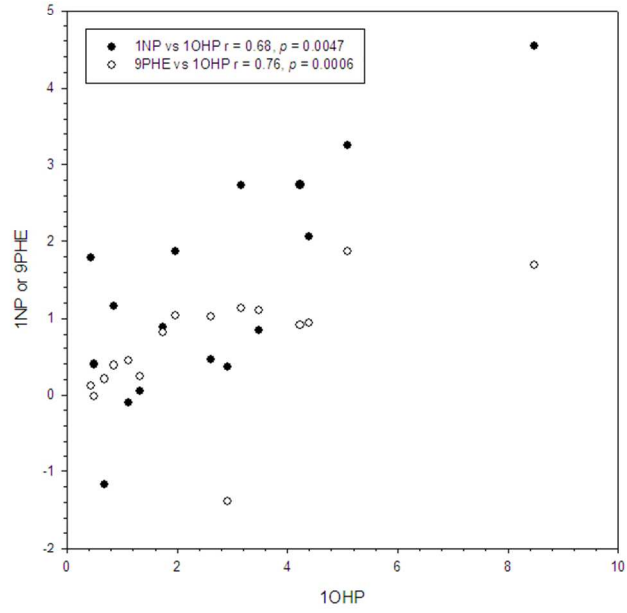

254x190mm (96 x 96 DPI)

Supplement: NIHMS320425-supplement-10_si_010.pdf [file NIHMS320425-supplement-10_si_010.pdf]

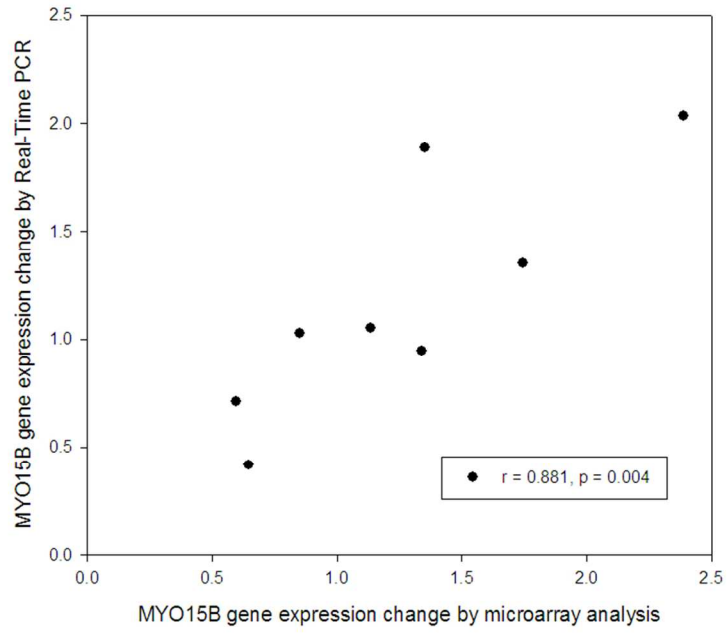

254x190mm (96 x 96 DPI)

Supplement: NIHMS320425-supplement-2_si_002.pdf [file NIHMS320425-supplement-2_si_002.pdf]

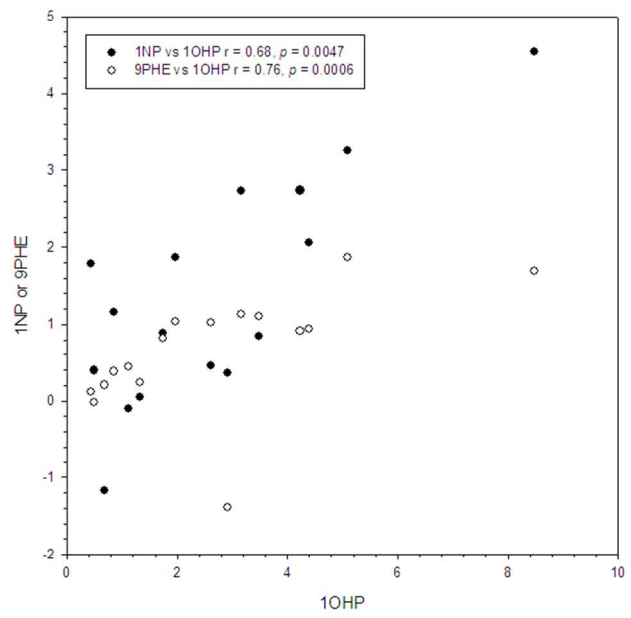

254x190mm (96 x 96 DPI)

Supplement: NIHMS320425-supplement-4_si_004.pdf [file NIHMS320425-supplement-4_si_004.pdf]

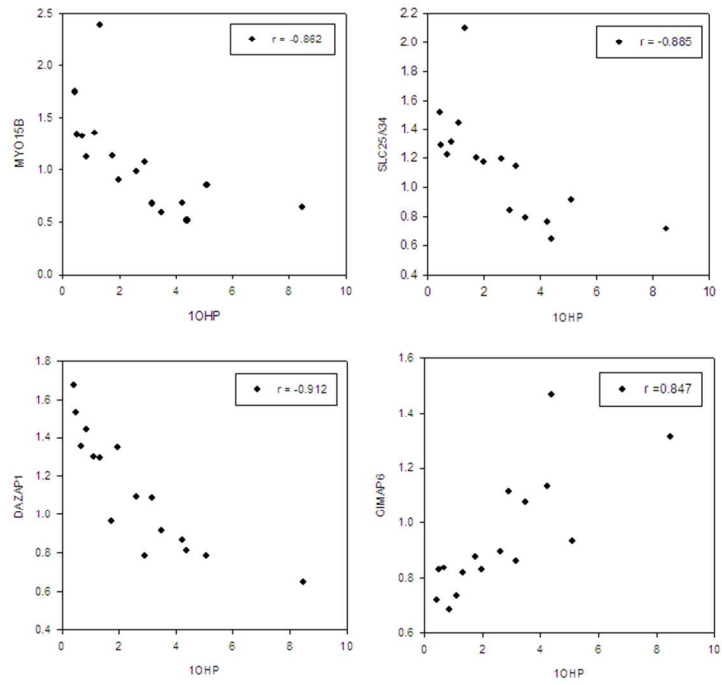

254x190mm (96 x 96 DPI)

Supplement: NIHMS320425-supplement-5_si_005.pdf [file NIHMS320425-supplement-5_si_005.pdf]

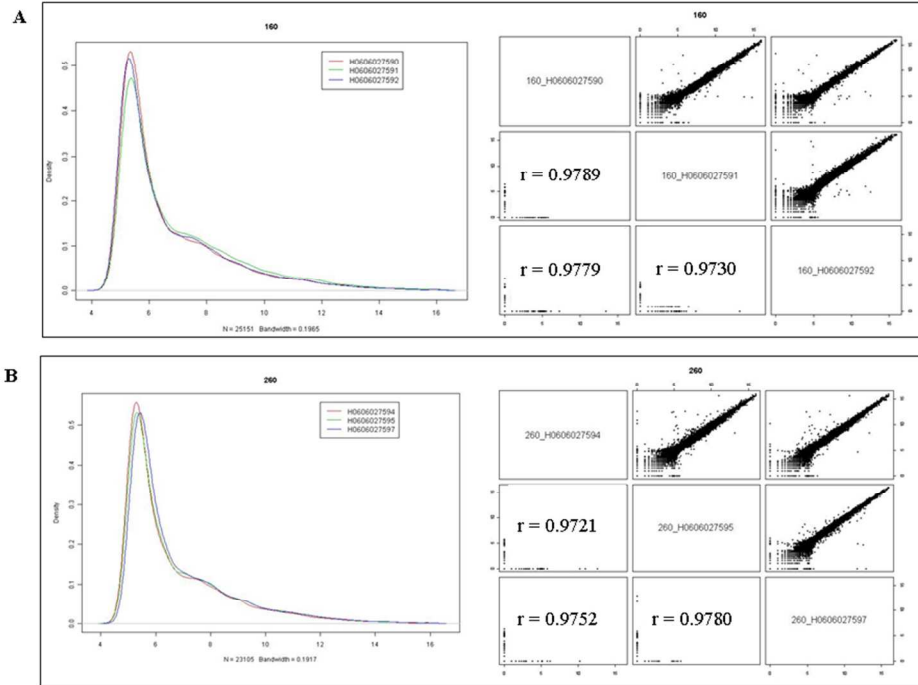

254x190mm (96 x 96 DPI)

Supplement: NIHMS320425-supplement-6_si_006.pdf [file NIHMS320425-supplement-6_si_006.pdf]

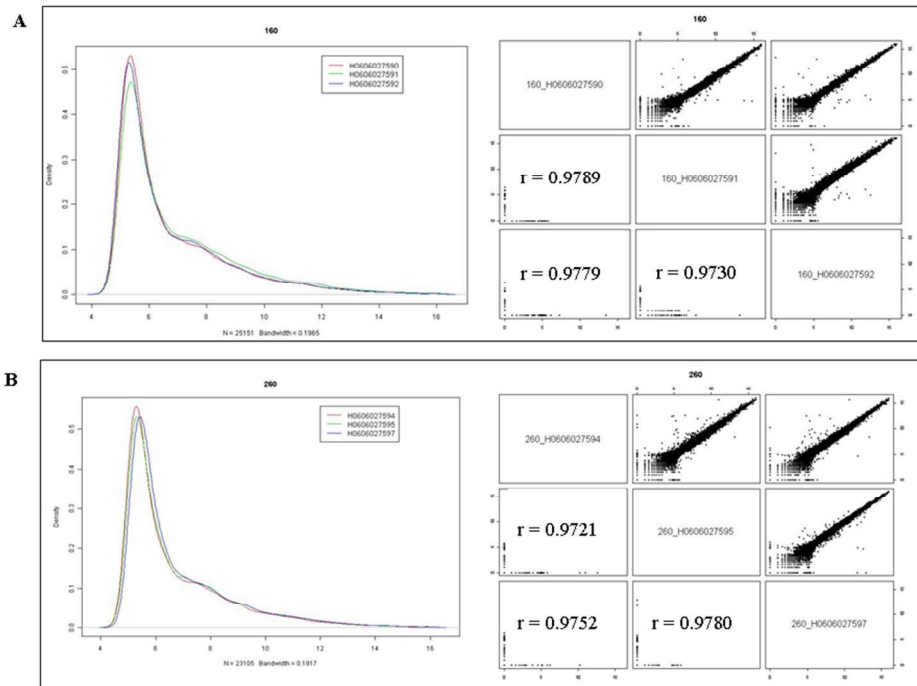

254x190mm (96 x 96 DPI)

Supplement: NIHMS320425-supplement-8_si_008.pdf [file NIHMS320425-supplement-8_si_008.pdf]

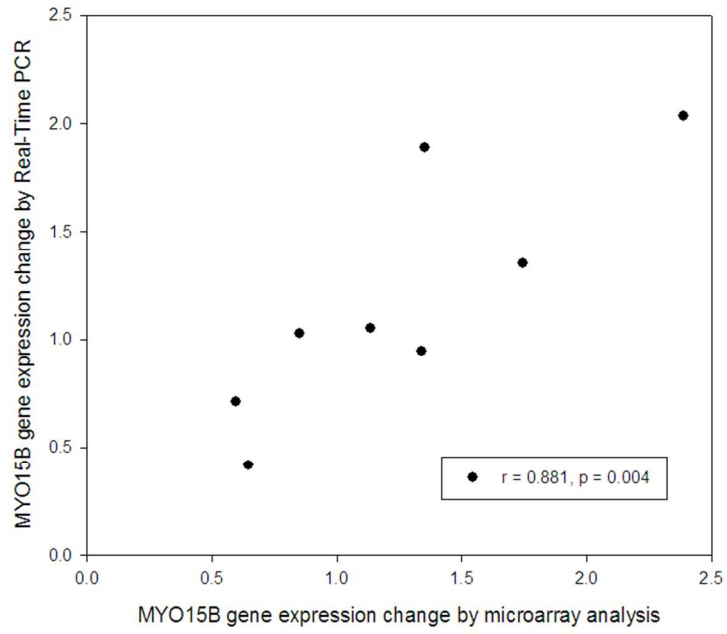

254x190mm (96 x 96 DPI)

Supplement: NIHMS320425-supplement-9_si_009.pdf [file NIHMS320425-supplement-9_si_009.pdf]
